# Supplementary material
Source: PubMed Central journal article supplement (PMC3511858)
Supplement: NIHMS419743-supplement-02.pdf [file NIHMS419743-supplement-02.pdf]

## Calabrese\_Fig\_S1

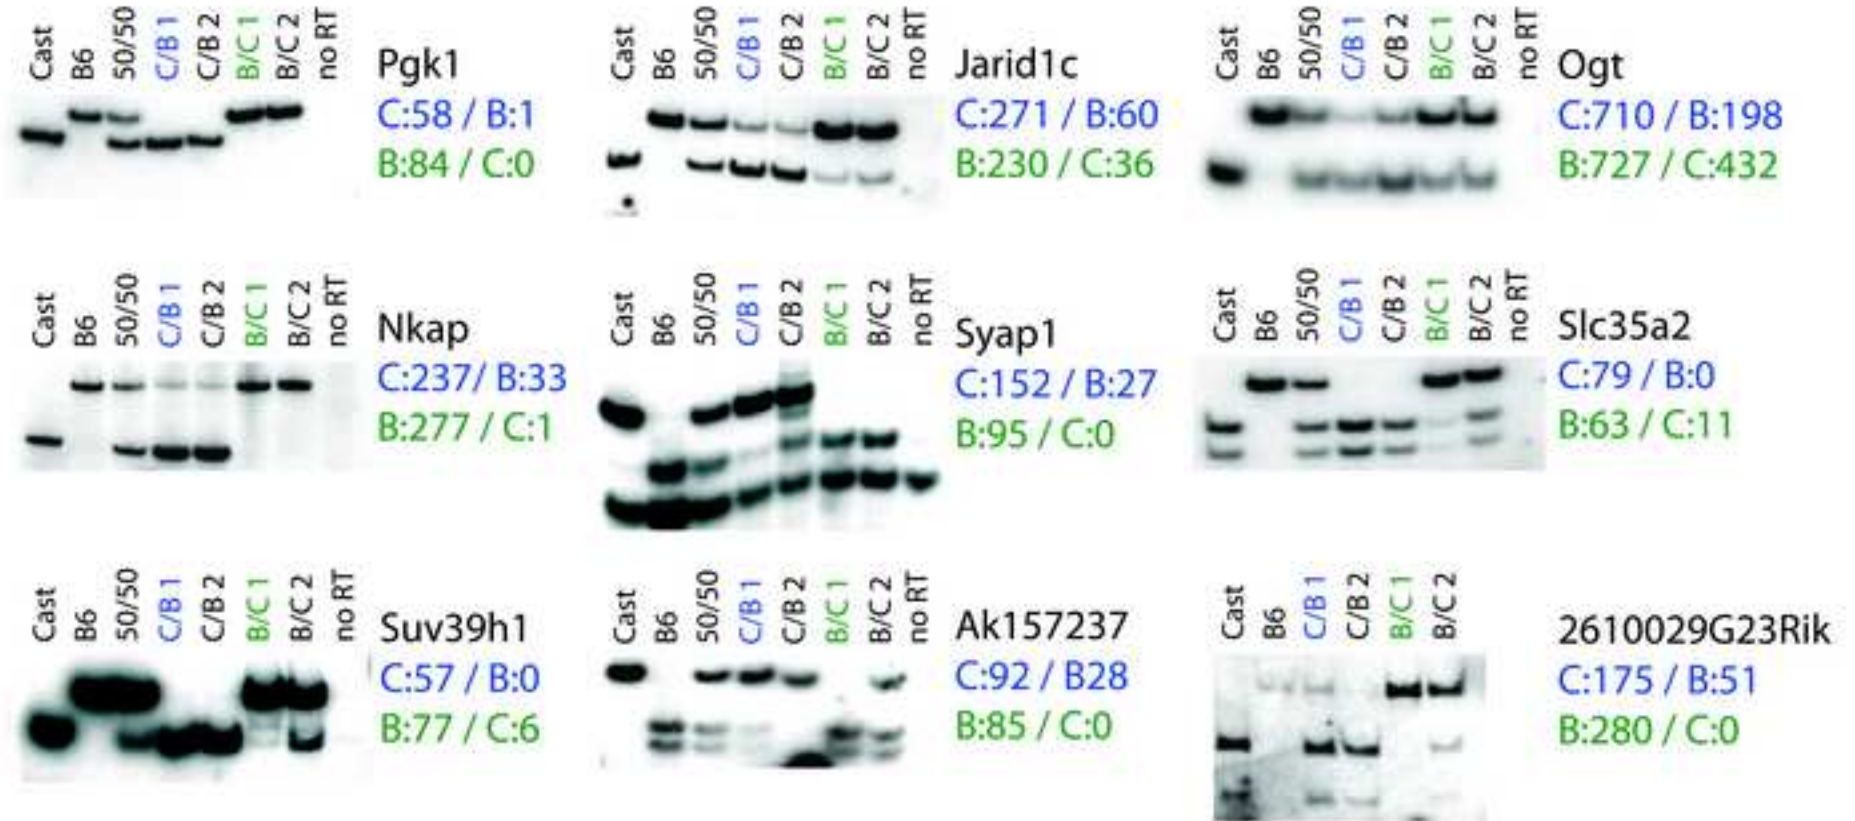

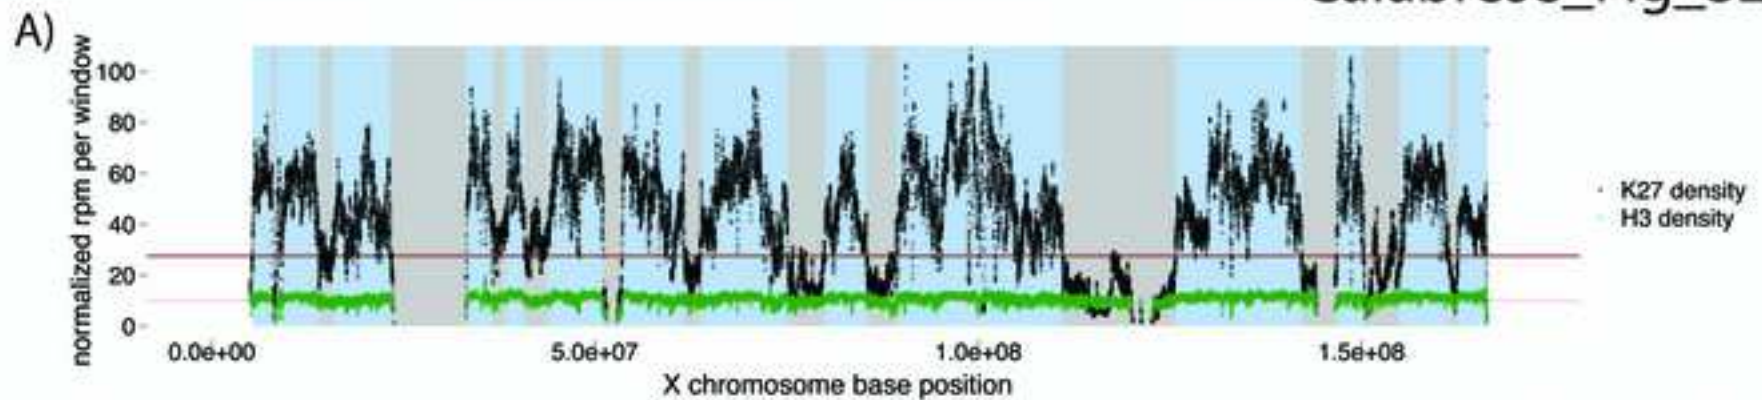

B)

| P/V #   | Start    | End      | Length   | Alignability | Prop. LINE | P/V #    | Start     | End       | Length   | Alignability | Prop. LINE |
|---------|----------|----------|----------|--------------|------------|----------|-----------|-----------|----------|--------------|------------|
| peak1   | 5300000  | 7900000  | 2600000  | 0.8491       | 0.2391     | peak8    | 63750000  | 75100000  | 11350000 | 0.7509       | 0.3333     |
| valley1 | 7900000  | 8450000  | 550000   | 0.4197       | 0.4959     | valley8  | 75100000  | 80000000  | 4900000  | 0.716        | 0.4883     |
| peak2   | 8450000  | 14000000 | 5550000  | 0.8389       | 0.2051     | peak9    | 80000000  | 85500000  | 5500000  | 0.8472       | 0.3033     |
| valley2 | 14000000 | 15750000 | 1750000  | 0.7439       | 0.4986     | valley9  | 85500000  | 89350000  | 3850000  | 0.6877       | 0.4864     |
| peak3   | 15750000 | 23250000 | 7500000  | 0.7706       | 0.3712     | peak10   | 89350000  | 111000000 | 21650000 | 0.7952       | 0.363      |
| valley3 | 23250000 | 33250000 | 10000000 | 0.0996       | 0.516      | valley10 | 111000000 | 125750000 | 14750000 | 0.6394       | 0.4429     |
| peak4   | 33250000 | 36750000 | 3500000  | 0.7468       | 0.2521     | peak11   | 125750000 | 142250000 | 16500000 | 0.8274       | 0.2912     |
| valley4 | 36750000 | 38250000 | 1500000  | 0.774        | 0.49       | valley11 | 142250000 | 146750000 | 4500000  | 0.4037       | 0.3341     |
| peak5   | 38250000 | 40750000 | 2500000  | 0.8476       | 0.2747     | peak12   | 146750000 | 150250000 | 3500000  | 0.8092       | 0.3051     |
| valley5 | 40750000 | 43750000 | 3000000  | 0.7601       | 0.5153     | valley12 | 150250000 | 155000000 | 4750000  | 0.758        | 0.3905     |
| peak6   | 43750000 | 51000000 | 7250000  | 0.8333       | 0.2871     | peak13   | 155000000 | 161450000 | 6450000  | 0.8595       | 0.2256     |
| valley6 | 51000000 | 53500000 | 2500000  | 0.2989       | 0.3444     | valley13 | 161450000 | 162500000 | 1050000  | 0.7712       | 0.4185     |
| peak7   | 53500000 | 61600000 | 8100000  | 0.8128       | 0.3363     | peak14   | 162500000 | 166450000 | 3950000  | 0.8792       | 0.2065     |
| valley7 | 61600000 | 63750000 | 2150000  | 0.7431       | 0.5095     |          |           |           |          |              |            |

C)

| Figure 3 probe ID: | Ube1x              | 15L             | 83H             | 78L            | Chic1             | 87L             | Rnf12              | 116L            | 160H            | 152L            |
|--------------------|--------------------|-----------------|-----------------|----------------|-------------------|-----------------|--------------------|-----------------|-----------------|-----------------|
| start              | 20224883           | 14720724        | 83580255        | 78014372       | 100537038         | 86998950        | 101145921          | 115875046       | 159658600       | 152749993       |
| stop               | 20264898           | 14919689        | 83773430        | 78205725       | 100577585         | 87167836        | 101187238          | 116079262       | 159867586       | 152931686       |
| length             | 4015               | 198965          | 193175          | 191353         | 40547             | 168886          | 41317              | 204216          | 208986          | 181693          |
| % align            | 92                 | 80              | 85              | 74             | 92                | 78              | 94                 | 74              | 82              | 75              |
| % LINE             | 5                  | 55              | 30              | 54             | 15                | 51              | 7                  | 56              | 27              | 56              |
| K27me3 (rpk)       | 513                | 185             | 410             | 95             | 638               | 101             | 574                | 45              | 368             | 113             |
| % cells w/2 dots   | 91                 | 94              | 96              | 95             | 90                | 94              | 98                 | 100             | 100             | 100             |
| BAC PAC ID         | G135-<br>P65743A11 | RP23-<br>204P18 | RP23-<br>351J22 | RP23-<br>267N5 | G135-<br>P66518D5 | RP23-<br>368B24 | G135-<br>P605237C7 | RP23-<br>468D22 | RP23-<br>133E13 | RP23-<br>259M13 |

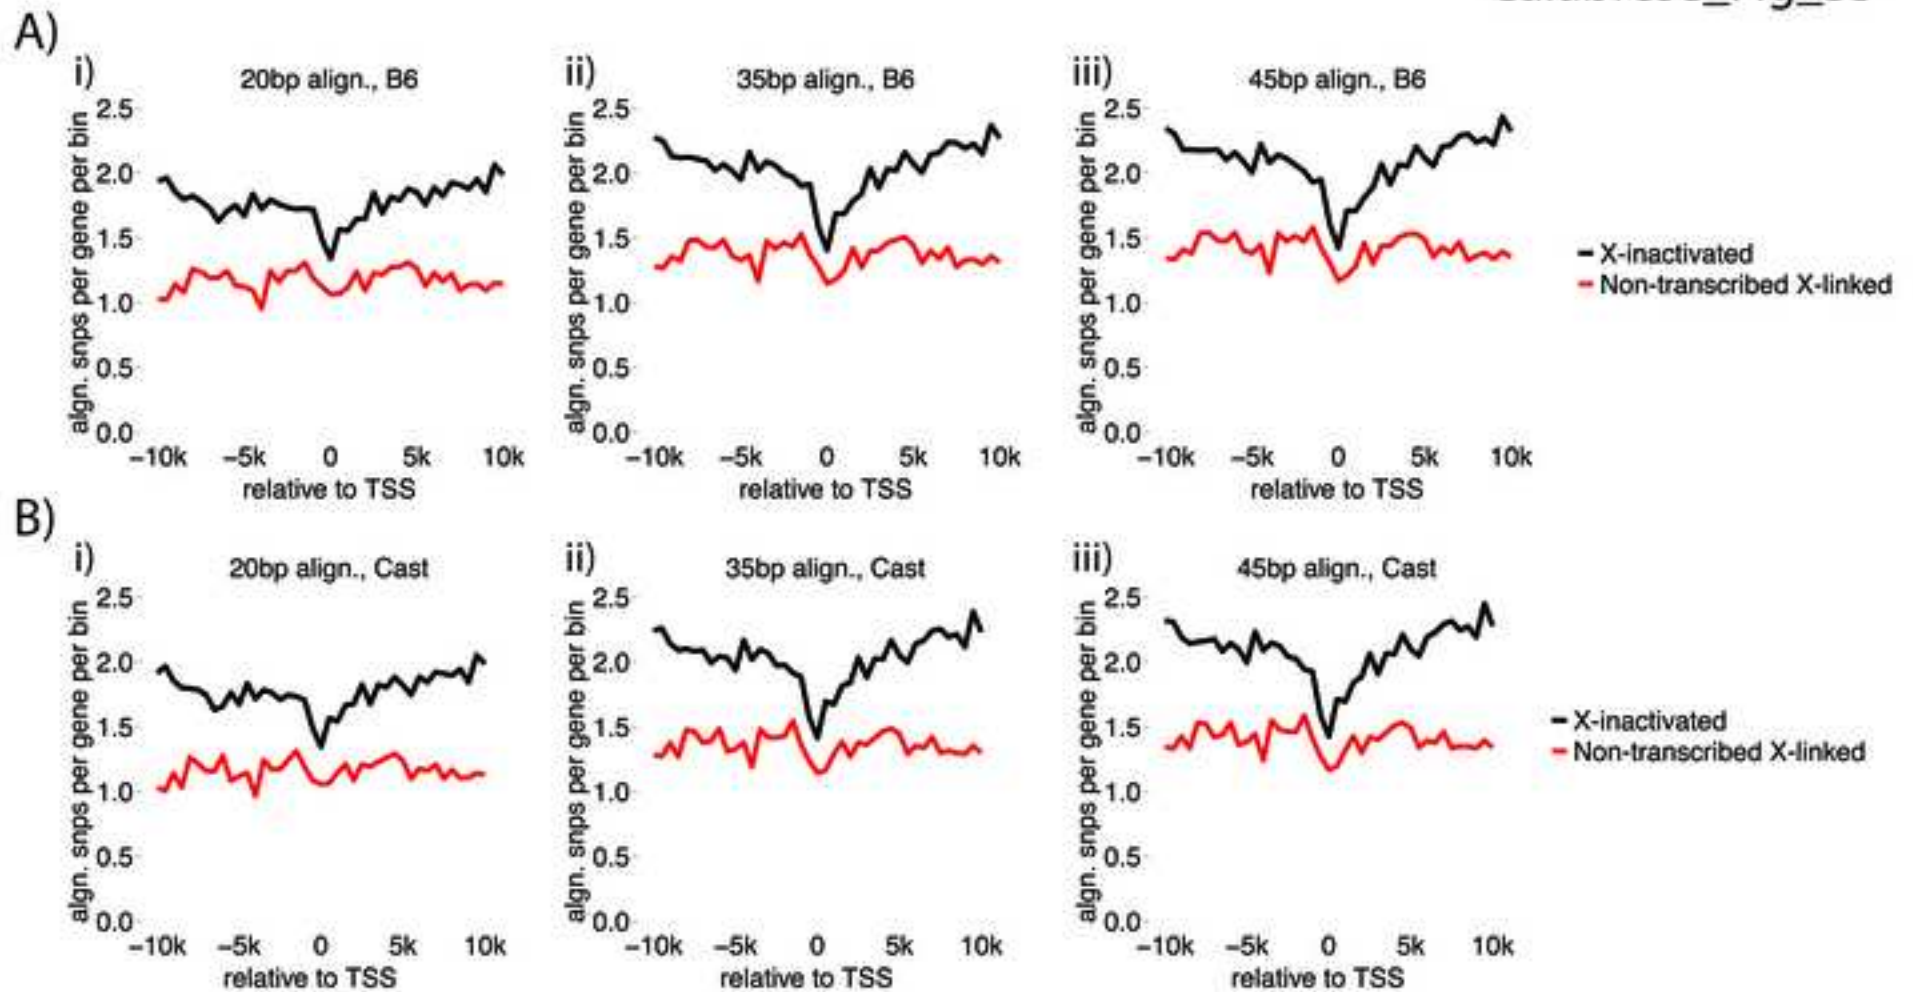



## Calabrese\_Figure\_S4

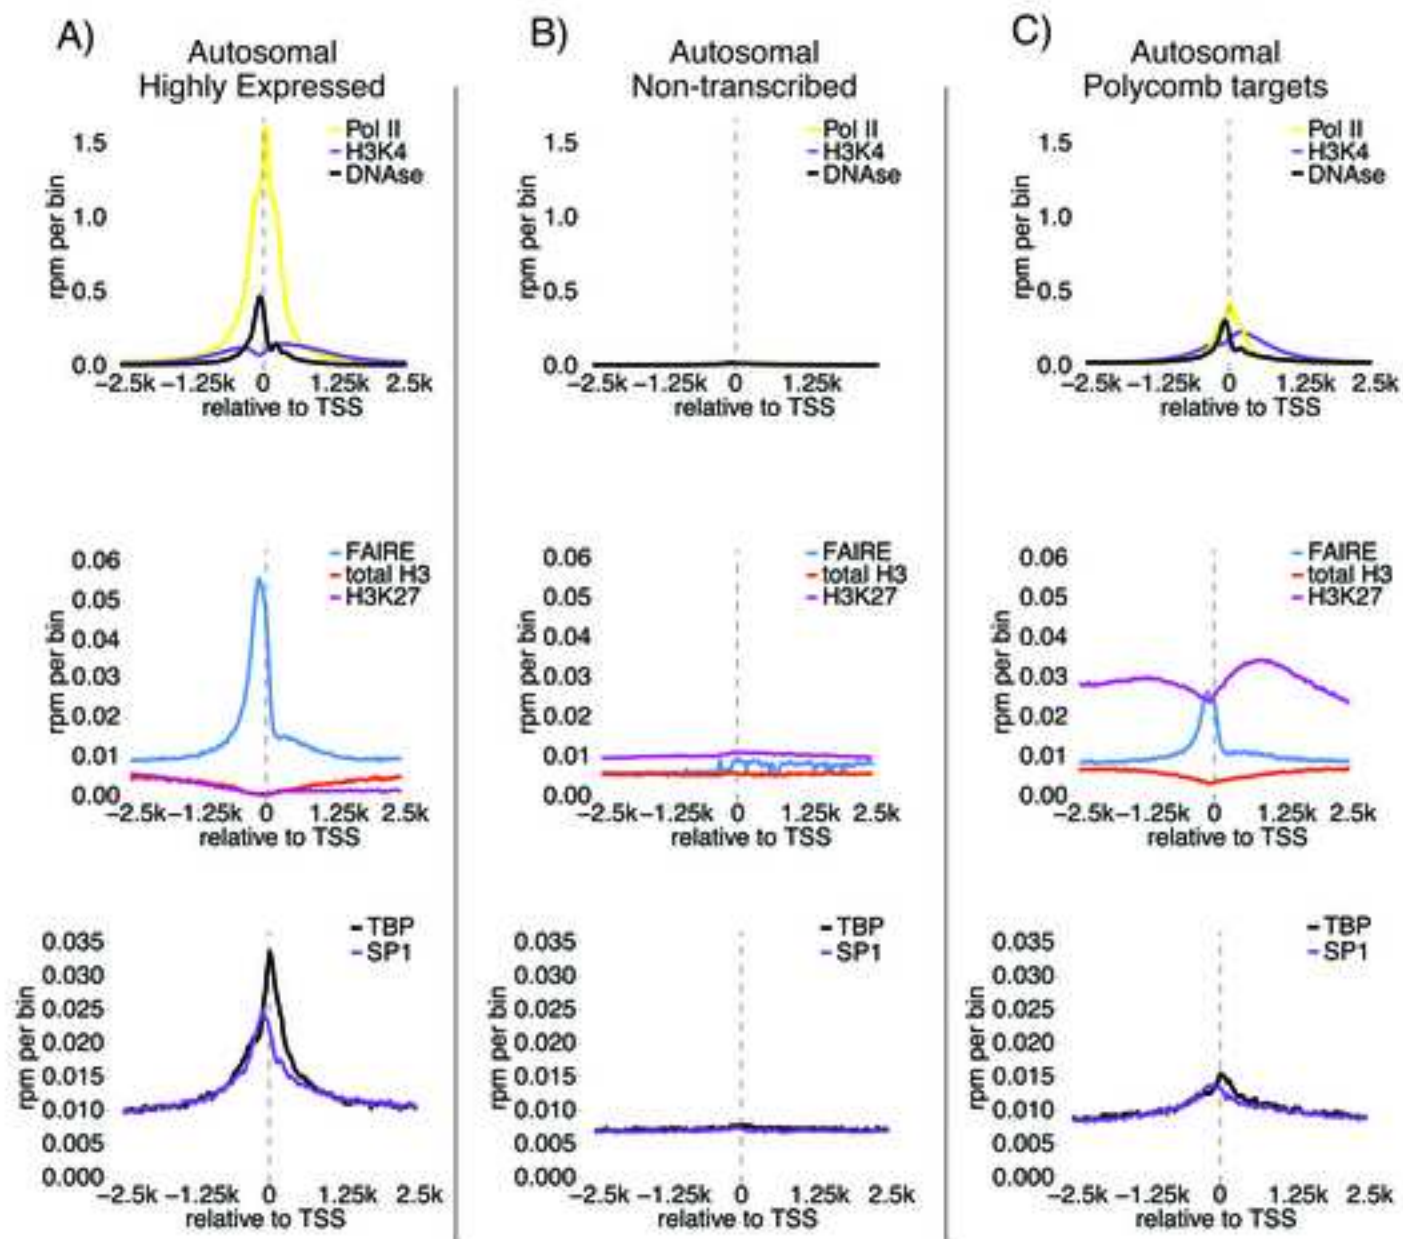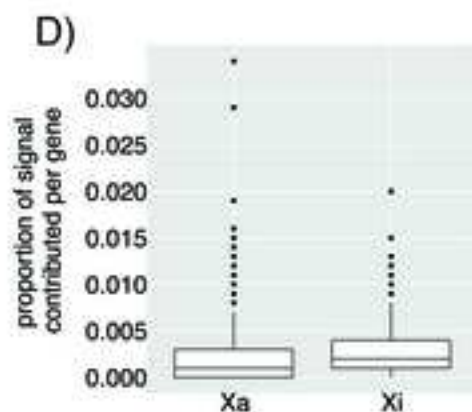

## Calabrese\_Fig\_S5

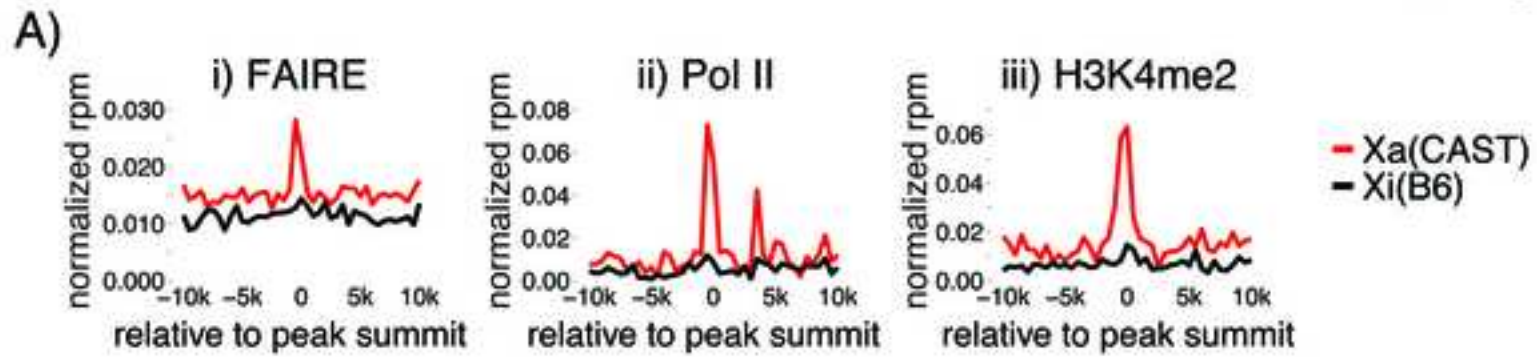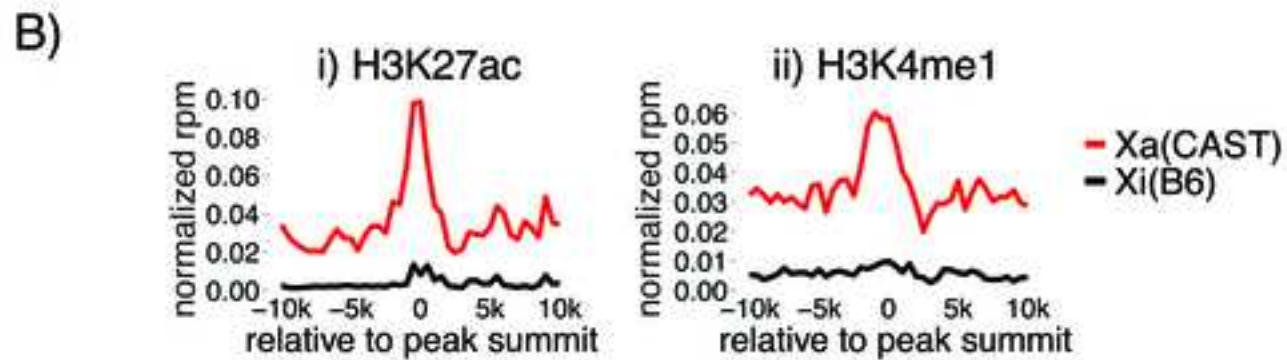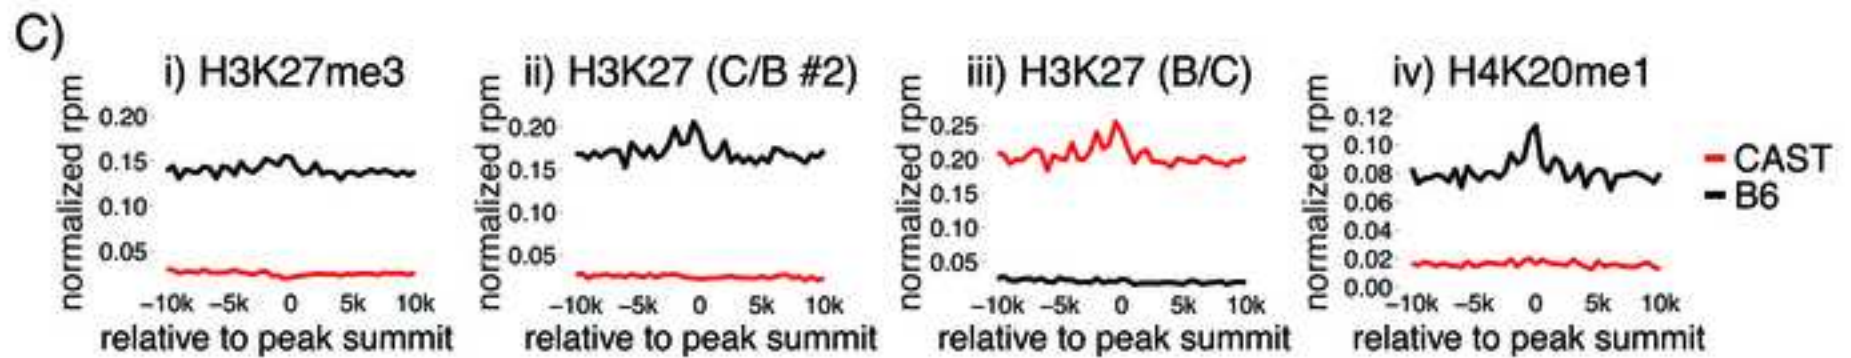

## Calabrese\_Fig\_S6

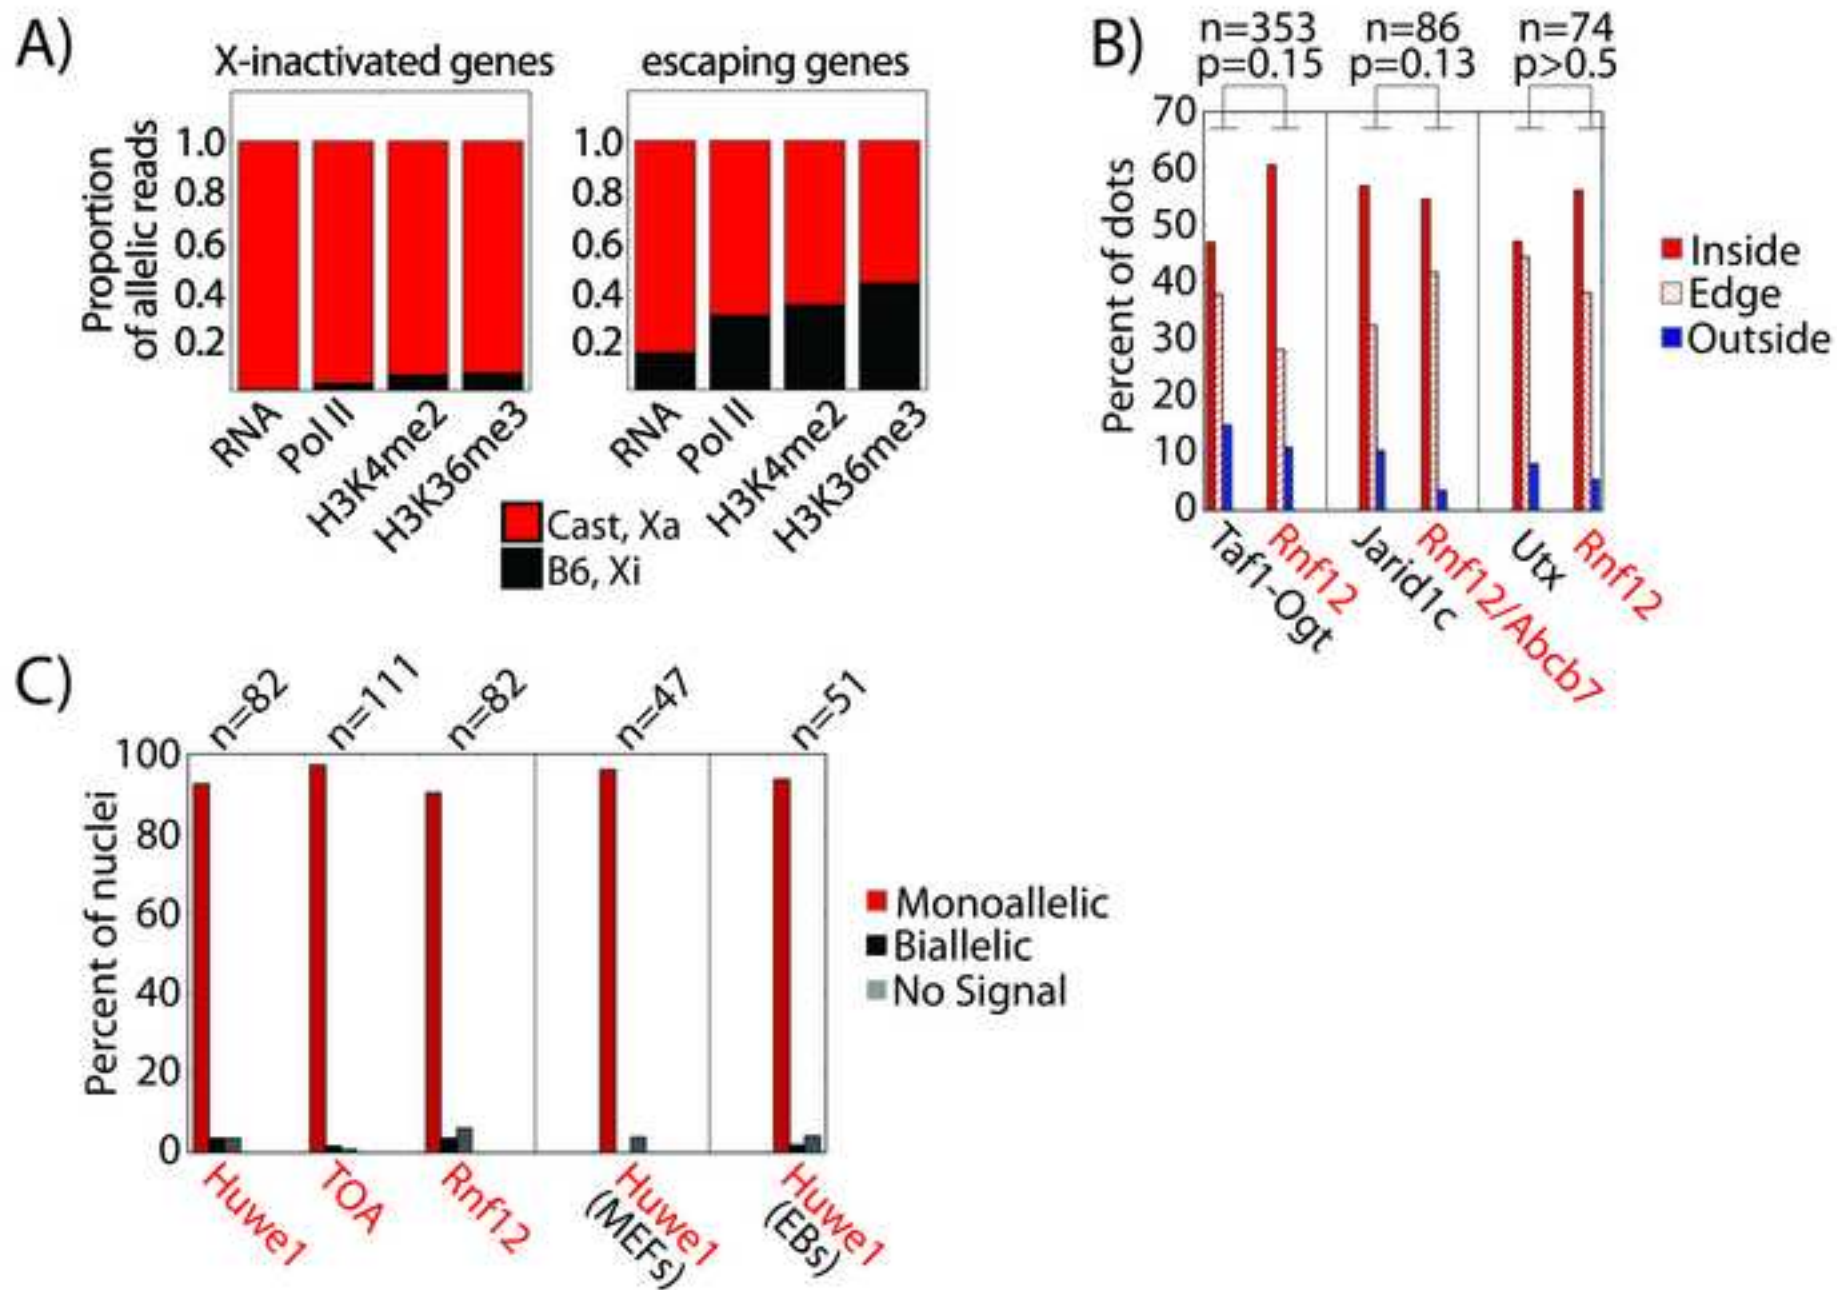

### Determination of XCI Using Allele-Specific RNA-seq

For gene  $i$ , let the number of allele-specific RNA-seq reads mapped to the inactivated/activated chromosomes be  $n_{i,0}$  and  $n_{i,1}$ , and let  $n_i \equiv n_{i,0} + n_{i,1}$ . We first model  $n_{i,0}$  by a binomial distribution:

$$p(n_{i,0}|n_i, p_i) = \binom{n_i}{n_{i,0}} p_i^{n_{i,0}} (1 - p_i)^{n_i - n_{i,0}},$$

where  $p_i$  indicates the expected proportion of reads from the inactivated chromosome. We further assume that  $p_i$  follows a mixture of two beta distributions:

$$f(p_i) = \pi_{i0} f_0(p_i; \alpha_0, \beta_0) + (1 - \pi_{i0}) f_1(p_i; \alpha_1, \beta_1), \quad (1)$$

where  $f_0(p_i; \alpha_0, \beta_0)$  and  $f_1(p_i; \alpha_1, \beta_1)$  are two beta distributions for inactivated genes and genes that escape inactivation, respectively, and  $\alpha_0$ ,  $\beta_0$ ,  $\alpha_1$ , and  $\beta_1$  are the unknown parameters to be estimated. Known inactivated genes, such as *Rnf12*, has  $p_i$  approaching 0. Therefore, in general,  $p_i$ 's from  $f_0(p_i; \alpha_0, \beta_0)$  are small (e.g.,  $< 0.01$ ), reflecting possible sequencing errors.  $\pi_{i0}$  is the prior probability that gene  $i$  is inactivated. We integrate out  $p_i$  to obtain the posterior distribution of  $n_{i,0}$  in terms of  $\alpha_0$ ,  $\beta_0$ ,  $\alpha_1$ , and  $\beta_1$ .

$$p(n_{i,0}|n_i, \alpha_0, \beta_0, \alpha_1, \beta_1) = \int p(n_{i,0}|n_i, p_i) f(p_i) dp_i = \pi_{i0} h_{i0} + (1 - \pi_{i0}) h_{i1}$$

where  $h_{i0}$  and  $h_{i1}$  are two beta-binomial distributions

$$h_{i0} = \binom{n_i}{n_{i,0}} \frac{B(n_{i,0} + \alpha_0, n_i - n_{i,0} + \beta_0)}{B(\alpha_0, \beta_0)}$$

$$h_{i1} = \binom{n_i}{n_{i,0}} \frac{B(n_{i,0} + \alpha_1, n_i - n_{i,0} + \beta_1)}{B(\alpha_1, \beta_1)}$$

and  $B(\alpha, \beta)$  is beta function with parameters  $\alpha$  and  $\beta$ . Beta-binomial distribution is a generalization of binomial distribution to allow extra variance, which has been used to model RNA-seq data before [Pickrell et al., 2010]. In this study, the extra variability comes from the fact that each gene has its own proportion of reads escaping inactivation.

For each read, we can obtain a base-calling quality score at the SNP location. We model the prior probability one gene escapes inactivation by a logistic regression with two predictors: the total number of escaping reads and the summation of quality scores of these reads (denoted by  $q_i$ ):

$$\log\left(\frac{\pi_{i0}}{1 - \pi_{i0}}\right) = b_0 + b_1 n_{i,0} + b_2 q_i, \quad (2)$$

where  $b_0$ ,  $b_1$ , and  $b_2$  are regression coefficients to be estimated.

Now we have finished the model setup and there are altogether seven parameters to be estimated:  $\alpha_0$ ,  $\alpha_1$ ,  $\beta_0$ ,  $\beta_1$ ,  $b_0$ ,  $b_1$ , and  $b_2$ . We estimated these parameters by Maximum Likelihood approach using Expectation-Maximization (EM) algorithm [Dempster et al., 1977]. For the robustness of the algorithm and based on the prior belief that most of genes are inactivated, we impose an extra restriction that  $\pi_{i0} \geq 0.2$ . This is equivalent to adding a large penalty  $\lambda I_{\pi_0 < 0.2}$  to the likelihood, where  $\lambda$  is an arbitrary large positive number and  $I_{\pi_0 < 0.2}$  is an indicator function which equals to 1 if  $\pi_0 < 0.2$  and 0 otherwise. To maximize this alternative likelihood, we simply maximize the original likelihood and set  $\pi_{i0}$  to be 0.2 if its estimate is smaller than 0.2. Our final results remain similar for any  $\pi_{i0}$  cutoff from 0.05 to 0.3. Given the parameter estimates from the EM algorithm, we can estimate the posterior probability that one gene is inactivated by

$$\hat{\tau}_{i0} = \frac{\hat{\pi}_{i0} \hat{h}_0}{\hat{\pi}_{i0} \hat{h}_{i0} + \hat{\pi}_{i1} \hat{h}_{i1}},$$

where the hat sign  $\hat{\cdot}$  indicates the estimate of the corresponding parameter. We then assign one gene as activated or inactivated based on  $\hat{\tau}_{i0}$ . Note that  $\hat{\tau}_{i0}$  can also be interpreted as local False Discovery Rate (FDR) [Efron et al., 2001]. If we claim one gene is activated when  $\hat{\tau}_{i0} \leq \tau_C$ , then the overall FDR is  $\sum_i \hat{\tau}_{i0} I_{\hat{\tau}_{i0} \leq \tau_C} / \sum_i I_{\hat{\tau}_{i0} \leq \tau_C}$ , where  $I_{\hat{\tau}_{i0} \leq \tau_C}$  is an indicator function, which equals to 1 if  $\hat{\tau}_{i0} \leq \tau_C$ , and 0 otherwise.

## References

[Dempster et al., 1977] Dempster, A., Laird, N., Rubin, D., et al., 1977. Maximum likelihood from incomplete data via the EM algorithm. *Journal of the Royal Statistical Society. Series B (Methodological)*, **39**(1):1–38.



[Efron et al., 2001] Efron, B., Tibshirani, R., Storey, J., and Tusher, V., 2001. Empirical Bayes analysis of a microarray experiment. *Journal of the American Statistical Association*, **96**(456):1151–1160.

[Pickrell et al., 2010] Pickrell, J., Marioni, J., Pai, A., Degner, J., Engelhardt, B., Nkadori, E., Veyrieras, J., Stephens, M., Gilad, Y., and Pritchard, J., *et al.*, 2010. Understanding mechanisms underlying human gene expression variation with RNA sequencing. *Nature*, **464**(7289):768–772.
